# Supplementary material for: Biomodulating healing after arthroscopic rotator cuff repair: the protocol of a randomised proof of concept trial (BIOHACK)
Source: HighWire-hosted journal article supplement (doi:10.1136/bmjopen-2022-071078), 2023-08-01
Supplement: bmjopen-2022-071078supp002_data_supplement.pdf [file bmjopen-2022-071078supp002_data_supplement.pdf]

Diagram of the study:

| Flow chart                                    |                          |                          |                          |                          |                          |
|-----------------------------------------------|--------------------------|--------------------------|--------------------------|--------------------------|--------------------------|
| <input checked="" type="checkbox"/> = Present | baseline                 | J45                      | J+3 mois                 | J+6 mois                 | J+12 mois                |
| Inclusion and exclusion criteria              | <input type="checkbox"/> |                          |                          |                          |                          |
| Informed consent                              | <input type="checkbox"/> |                          |                          |                          |                          |
| Demographic data                              | <input type="checkbox"/> |                          |                          |                          |                          |
| Blood sample (vit D + cholesterol)            | <input type="checkbox"/> |
| Physical examination/function tests           | <input type="checkbox"/> |
| Constant-Murley                               | <input type="checkbox"/> |
| ASES                                          | <input type="checkbox"/> |
| VAS pain                                      | <input type="checkbox"/> |
| SSV                                           | <input type="checkbox"/> |
| MRI rotator cuff imaging                      |                          |                          |                          |                          | <input type="checkbox"/> |

|                                      | Selection               | Study period    |      |    |    |                    |
|--------------------------------------|-------------------------|-----------------|------|----|----|--------------------|
|                                      | D-60 to J0 <sup>a</sup> | J0 <sup>a</sup> | M1,5 | M3 | M6 | M12                |
| Visits                               | V1                      | V2              | V3   | V4 | V5 | V6<br>End of study |
| Free and informed consent            | X                       |                 |      |    |    |                    |
| Verification of eligibility criteria | X                       |                 |      |    |    |                    |
| Previous treatments                  | X                       |                 |      |    |    |                    |
| Concomitant treatments <sup>b</sup>  | X                       | X               |      |    |    |                    |

|                                                                                                                                                                                                                                   | Selection               | Study period    |              |            |            |                    |
|-----------------------------------------------------------------------------------------------------------------------------------------------------------------------------------------------------------------------------------|-------------------------|-----------------|--------------|------------|------------|--------------------|
|                                                                                                                                                                                                                                   | D-60 to J0 <sup>a</sup> | J0 <sup>a</sup> | M1,5         | M3         | M6         | M12                |
| Visits                                                                                                                                                                                                                            | V1                      | V2              | V3           | V4         | V5         | V6<br>End of study |
| Comorbidités                                                                                                                                                                                                                      | X                       | X               | X            | X          | X          | X                  |
| Clinical examination (height, weight, BMI, mobility)                                                                                                                                                                              | X                       |                 | X            | X          | X          | X                  |
| Pre-anesthetic blood tests                                                                                                                                                                                                        | X                       |                 |              |            |            |                    |
| Blood tests <sup>c</sup>                                                                                                                                                                                                          | X <sup>d</sup>          |                 |              |            |            |                    |
| Randomisation                                                                                                                                                                                                                     | X                       |                 |              |            |            |                    |
| Demographics (age, inclusion number and date of consent)                                                                                                                                                                          | X                       |                 |              |            |            |                    |
| Surgery                                                                                                                                                                                                                           |                         | X               |              |            |            |                    |
| Evaluation offunction, pain, mobility:<br>Score Constant-Murley<br>(Completed by you and your doctor)<br>Score ASES<br>(Completed by yourself)                                                                                    | X<br><br>X              |                 | X<br><br>X   | X<br><br>X | X<br><br>X | X<br><br>X         |
| Function Evaluation:<br>Score SSV<br>(Completed by yourself)                                                                                                                                                                      | X                       |                 | X            | X          | X          | X                  |
| Pain assessment:<br>Score EVA<br>(Completed by yourself)                                                                                                                                                                          | X                       |                 | X            | X          | X          | X                  |
| Imaging (MRI)                                                                                                                                                                                                                     |                         |                 |              |            |            | X                  |
| Follow-up of surgical complications / readmissions / rehospitalizations                                                                                                                                                           |                         |                 | X            | X          | X          | X                  |
| Unwanted events                                                                                                                                                                                                                   | X                       | X               | X            | X          | X          | X                  |
| Patient diary (completed daily) <sup>e</sup>                                                                                                                                                                                      |                         | X               | <del>X</del> |            |            |                    |
| <sup>a</sup> The date of signature of the consent will act as J0 for the 2 groups.<br><sup>b</sup> Particularly treatments for blood pressure, diabetes, dyslipidemia and sleep apnea.<br><sup>c</sup> Research-specific reviews: |                         |                 |              |            |            |                    |

|                                                                                                                                                                                                                                                                                                                                                                                                                               | Selection               | Study period    |      |    |    |                    |
|-------------------------------------------------------------------------------------------------------------------------------------------------------------------------------------------------------------------------------------------------------------------------------------------------------------------------------------------------------------------------------------------------------------------------------|-------------------------|-----------------|------|----|----|--------------------|
|                                                                                                                                                                                                                                                                                                                                                                                                                               | D-60 to J0 <sup>a</sup> | J0 <sup>a</sup> | M1,5 | M3 | M6 | M12                |
| Visits                                                                                                                                                                                                                                                                                                                                                                                                                        | V1                      | V2              | V3   | V4 | V5 | V6<br>End of study |
| <div>- Vitamin D balance (25-hydroxyvitamin D and 1.25 dihydroxyvitamin D)</div> <div>- Lipid balance (total cholesterol, LDL cholesterol, HDL cholesterol and triglycerides)</div> <div>- If diabete:Lycated Emoglobin H (HbA1c)</div> <div><sup>d</sup> Results should be dated no more than 60 days before J0.</div> <div><sup>e</sup> Only for patients in the biomodulation group the day after the procedure (J0)</div> |                         |                 |      |    |    |                    |
